# Supplementary material for: Prognostic and therapeutic potential of gene profiles related to tertiary lymphoid structures in colorectal cancer
Source: PeerJ. 2024 Oct 31;12:e18401. doi: 10.7717/peerj.18401 (PMC11531753; doi:10.7717/peerj.18401)
Supplement: Supplemental Information 5 — The OD value of cell vability. [file peerj-12-18401-s005.xlsx]

## Sheet: Sheet1
HCT116	OD(450nm)
C5AR1	si NC	si 1#	si 2#
0h	0.6543	0.6012	0.5514
0h	0.6491	0.5956	0.5562
0h	0.6578	0.6023	0.5531
0h	0.6602	0.5987	0.5498
24h	1.0549	0.8523	0.8008
24h	1.0507	0.8592	0.7967
24h	1.0583	0.8491	0.8054
24h	1.0471	0.8546	0.7981
48h	1.5521	1.2529	1.2051
48h	1.5587	1.2473	1.1987
48h	1.5443	1.2561	1.2034
48h	1.5476	1.2498	1.2096
72h	2.0054	1.6037	1.5543
72h	1.9983	1.5971	1.5489
72h	2.0126	1.6094	1.5607
72h	2.0031	1.6008	1.5532
96h	2.5051	2.1032	2.0534
96h	2.4968	2.0974	2.0592
96h	2.5074	2.1103	2.0481
96h	2.5032	2.1048	2.0543
APOE	si NC	si 1#	si 2#
0h	0.5998	0.6513	0.6012
0h	0.6143	0.6531	0.6117
0h	0.5985	0.648	0.5975
0h	0.612	0.6621	0.6109
24h	1.1089	0.8912	0.8512
24h	1.1134	0.8995	0.8653
24h	1.1025	0.8821	0.8429
24h	1.1168	0.9043	0.8617
48h	1.6025	1.3056	1.2531
48h	1.6173	1.3123	1.2675
48h	1.5952	1.2957	1.2459
48h	1.6108	1.3162	1.2623
72h	2.1056	1.7049	1.6535
72h	2.1102	1.7143	1.6691
72h	2.1023	1.6907	1.6452
72h	2.1184	1.7129	1.6632
96h	2.4083	2.1034	2.0512
96h	2.421	2.1151	2.0658
96h	2.4049	2.0942	2.0423
96h	2.4176	2.1157	2.0642
CYP1B1	si NC	si 1#	si 2#
0h	0.4554	0.5032	0.5523
0h	0.4617	0.5098	0.5587
0h	0.4503	0.4991	0.5489
0h	0.4632	0.5102	0.561
24h	1.0012	0.7512	0.7532
24h	1.0098	0.7598	0.7607
24h	0.9903	0.7417	0.7413
24h	1.0154	0.7613	0.7654
48h	1.4011	1.0523	1.0031
48h	1.4102	1.0608	1.012
48h	1.3903	1.0392	0.9908
48h	1.4156	1.0623	1.0165
72h	1.8021	1.4032	1.4034
72h	1.8109	1.4108	1.4127
72h	1.7923	1.3903	1.3902
72h	1.8183	1.4156	1.4183
96h	2.2023	1.8032	1.7531
96h	2.2102	1.8098	1.7612
96h	2.1903	1.8903	1.7409
96h	2.2156	1.8154	1.7694
SPP1	si NC	si 1#	si 2#
0h	0.512	0.5508	0.5024
0h	0.4984	0.5412	0.4923
0h	0.5056	0.5486	0.4985
0h	0.5102	0.5523	0.5042
24h	1.0985	0.7976	0.6956
24h	1.1076	0.8012	0.7023
24h	1.1034	0.7984	0.6987
24h	1.1098	0.8035	0.7029
48h	1.4908	1.0898	0.9923
48h	1.5045	1.0956	0.9986
48h	1.5002	1.0912	0.995
48h	1.5058	1.0984	1.0002
72h	1.8023	1.4024	1.2987
72h	1.8104	1.4076	1.3054
72h	1.8056	1.4035	1.3012
72h	1.812	1.4089	1.3084
96h	2.1985	1.7968	1.695
96h	2.2102	1.8012	1.7012
96h	2.2058	1.7987	1.6968
96h	2.2123	1.8054	1.7036
HT29	OD(450nm)
C5AR1	si NC	si 1#	si 2#
0h	0.5216	0.5724	0.6253
0h	0.5295	0.5802	0.6332
0h	0.5162	0.5658	0.6213
0h	0.5334	0.5831	0.6389
24h	1.2248	1.2721	0.9213
24h	1.2326	0.9799	0.9292
24h	1.2207	0.9655	0.9159
24h	1.2383	0.9828	0.9331
48h	1.8234	1.3707	1.3199
48h	1.8313	1.3786	1.3278
48h	1.8194	1.3642	1.3145
48h	1.837	1.3815	1.3317
72h	2.2221	1.7694	1.7186
72h	2.23	1.7773	1.7265
72h	2.2181	1.763	1.7132
72h	2.2357	1.7803	1.7304
96h	2.5206	2.0679	2.0171
96h	2.5285	2.0758	2.025
96h	2.5166	2.0615	2.0117
96h	2.5342	2.0788	2.0289
APOE	si NC	si 1#	si 2#
0h	0.5888	0.5698	0.5555
0h	0.5549	0.5281	0.5694
0h	0.5575	0.57	0.5566
0h	0.5421	0.5162	0.5884
24h	1.2764	1.0568	1.0253
24h	1.2677	1.0323	1.0371
24h	1.2227	1.0501	1.0404
24h	1.2642	1.0597	1.0913
48h	1.7556	1.3516	1.3331
48h	1.7139	1.3757	1.354
48h	1.7673	1.3779	1.3463
48h	1.7233	1.3694	1.3372
72h	2.0507	1.6462	1.6647
72h	2.0413	1.5979	1.6558
72h	2.0231	1.643	1.656
72h	2.0191	1.666	1.6395
96h	2.214	1.8238	1.7655
96h	2.2779	1.8185	1.7402
96h	2.2315	1.7994	1.7153
96h	2.2932	1.7602	1.7547
CYP1B1	si NC	si 1#	si 2#
0h	0.577	0.5356	0.5541
0h	0.5447	0.5715	0.5212
0h	0.5517	0.5357	0.5373
0h	0.5437	0.581	0.5203
24h	0.9727	0.8378	0.8255
24h	0.9786	0.8412	0.8309
24h	0.9143	0.839	0.8401
24h	0.9726	0.8511	0.8795
48h	1.3443	1.0589	1.0312
48h	1.3186	1.0692	1.05
48h	1.361	1.0834	1.042
48h	1.3181	1.0757	1.0313
72h	1.638	1.3356	1.2729
72h	1.6419	1.3945	1.2582
72h	1.6155	1.3326	1.2549
72h	1.6109	1.3574	1.2392
96h	2.121	1.6333	1.6526
96h	2.178	1.6286	1.6333
96h	2.1367	1.6066	1.6103
96h	2.1993	1.6635	1.6452
SPP1	si NC	si 1#	si 2#
0h	0.5716	0.6158	0.6152
0h	0.5544	0.6115	0.6139
0h	0.5597	0.6156	0.6144
0h	0.5284	0.6121	0.6121
24h	0.9683	0.7564	0.7338
24h	0.9741	0.7423	0.728
24h	0.916	0.7341	0.7387
24h	0.9517	0.7674	0.6936
48h	1.3491	1.0432	1.0322
48h	1.3065	1.0785	1.038
48h	1.3622	1.0685	1.0383
48h	1.3179	1.0681	1.0286
72h	1.7503	1.2339	1.2517
72h	1.7384	1.2978	1.2558
72h	1.716	1.2413	1.2478
72h	1.7219	1.2485	1.2299
96h	2.1068	1.6336	1.5665
96h	2.1821	1.6212	1.5348
96h	2.1408	1.5926	1.5135
96h	2.2043	1.6488	1.5532
