# Supplementary material for: Prognostic and therapeutic potential of gene profiles related to tertiary lymphoid structures in colorectal cancer
Source: PeerJ. 2024 Oct 31;12:e18401. doi: 10.7717/peerj.18401 (PMC11531753; doi:10.7717/peerj.18401)
Supplement: Supplemental Information 6 — Raw and statistical results of qPCR in cell experiments. [file peerj-12-18401-s006.xlsx]

## Sheet: Sheet1
HCT116
C5AR1	Gapdh	SiRNA	ΔCт	ΔCт Mean 0h	ΔΔCт	2-△△CT	Mean	SD	P
Si_NC	13.8253	21.4592	7.63391	7.52826	0.105656	0.929382	1.00238	0.0697408
Si_NC	13.9131	21.3086	7.39559	7.52826	-0.132668	1.09632
Si_NC	13.9434	21.4987	7.55527	7.52826	0.0270128	0.98145
Si_C5AR1 1#	13.9636	23.5269	9.56327	7.52826	2.03502	0.244005	0.223824	0.0312557	0.000134906
Si_C5AR1 1#	13.8599	23.4009	9.54106	7.52826	2.0128	0.247791
Si_C5AR1 1#	13.7143	23.719	10.0048	7.52826	2.47653	0.179676
Si_C5AR1 2#	13.5202	23.3239	9.80374	7.52826	2.27548	0.206544	0.19131	0.0224399	9.71955e-05
Si_C5AR1 2#	13.6054	23.4004	9.79497	7.52826	2.26671	0.207803
Si_C5AR1 2#	13.5306	23.7065	10.1759	7.52826	2.64761	0.159584
APOE	Gapdh	SiRNA	ΔCт	ΔCт Mean 0h	ΔΔCт	2-△△CT	Mean	SD	P
Si_NC	13.8253	21.9441	8.11875	7.63631	0.482439	0.715767	1.02703	0.222501
Si_NC	13.9131	21.2594	7.34635	7.63631	-0.28996	1.22261
Si_NC	13.9434	21.3873	7.44383	7.63631	-0.192479	1.14273
Si_APOE 1#	13.815	23.3235	9.50854	7.63631	1.87223	0.273152	0.261211	0.0152484	0.00797751
Si_APOE 1#	13.7537	23.2747	9.52106	7.63631	1.88475	0.270791
Si_APOE 1#	13.6521	23.3492	9.69708	7.63631	2.06076	0.239689
Si_APOE 2#	13.9636	23.6458	9.68219	7.63631	2.04588	0.242175	0.244903	0.0347789	0.00830233
Si_APOE 2#	13.8599	23.288	9.42819	7.63631	1.79187	0.288797
Si_APOE 2#	13.7143	23.6458	9.93153	7.63631	2.29522	0.203737
CYP1B1	Gapdh	SiRNA	ΔCт	ΔCт Mean 0h	ΔΔCт	2-△△CT	Mean	SD	P
Si_NC	14.9214	21.2662	6.34479	6.71758	-0.372788	1.29485	1.03461	0.253783
Si_NC	14.7748	21.3308	6.55597	6.71758	-0.16161	1.11853
Si_NC	14.6695	21.9215	7.25197	6.71758	0.534398	0.690447
Si_CYP1B1 1#	14.9059	23.0787	8.17282	6.71758	1.45524	0.364694	0.292645	0.0666616	0.0161439
Si_CYP1B1 1#	14.8078	23.2184	8.41062	6.71758	1.69305	0.309273
Si_CYP1B1 1#	14.9185	23.9297	9.01117	6.71758	2.29359	0.203967
Si_CYP1B1 2#	14.6248	23.332	8.70722	6.71758	1.98965	0.251801	0.249923	0.0141185	0.0120061
Si_CYP1B1 2#	14.6828	23.5096	8.82682	6.71758	2.10924	0.231769
Si_CYP1B1 2#	14.6913	23.3183	8.627	6.71758	1.90943	0.266198
SPP1	Gapdh	SiRNA	ΔCт	ΔCт Mean 0h	ΔΔCт	2-△△CT	Mean	SD	P
Si_NC	14.9214	21.2079	6.28648	6.62789	-0.341413	1.267	1.04383	0.279487
Si_NC	14.7748	21.122	6.34721	6.62789	-0.28068	1.21477
Si_NC	14.6695	21.9195	7.24998	6.62789	0.622093	0.649728
Si_SPP1 1#	14.9059	23.8796	8.97368	6.62789	2.34579	0.196719	0.231114	0.0344008	0.0150791
Si_SPP1 1#	14.8078	23.6299	8.82208	6.62789	2.19419	0.218515
Si_SPP1 1#	14.9185	23.3927	8.47417	6.62789	1.84628	0.278109
Si_SPP1 2#	14.6248	23.6185	8.99368	6.62789	2.36579	0.19401	0.223221	0.0209971	0.0143691
Si_SPP1 2#	14.6828	23.3549	8.67213	6.62789	2.04425	0.242449
Si_SPP1 2#	14.6913	23.4195	8.72823	6.62789	2.10034	0.233204
HT29
C5AR1	Gapdh	SiRNA	ΔCт	ΔCт Mean 0h	ΔΔCт	2-△△CT	Mean	SD	P
Si_NC	13.7969	20.7889	6.99197	6.79444	0.197533	0.872041	1.00477	0.0959477
Si_NC	13.7924	20.4552	6.66278	6.79444	-0.131654	1.09555
Si_NC	13.7028	20.4313	6.72856	6.79444	-0.0658789	1.04672
Si_C5AR1 1#	13.7235	22.3275	8.604	6.79444	1.80957	0.285277	0.276198	0.0331268	0.000530355
Si_C5AR1 1#	13.6998	22.1772	8.47731	6.79444	1.68287	0.311462
Si_C5AR1 1#	13.727	22.6302	8.90314	6.79444	2.1087	0.231856
Si_C5AR1 2#	13.8936	22.8399	8.94627	6.79444	2.15183	0.225027	0.244655	0.0139088	0.000376342
Si_C5AR1 2#	13.8762	22.6388	8.7626	6.79444	1.96817	0.255578
Si_C5AR1 2#	13.9283	22.7034	8.77518	6.79444	1.98074	0.25336
APOE	Gapdh	SiRNA	ΔCт	ΔCт Mean 0h	ΔΔCт	2-△△CT	Mean	SD	P
Si_NC	13.7969	20.9742	7.17729	6.88142	0.295861	0.814586	1.02961	0.258347
Si_NC	13.7924	20.8561	7.06369	6.88142	0.182266	0.881318
Si_NC	13.7028	20.1061	6.4033	6.88142	-0.478127	1.39293
Si_APOE 1#	13.7235	22.3156	8.59204	6.88142	1.71061	0.305531	0.297496	0.0829396	0.0161404
Si_APOE 1#	13.6998	22.4483	8.74847	6.88142	1.86705	0.274133
Si_APOE 1#	13.727	22.285	8.558	6.88142	1.67658	0.312824
Si_APOE 2#	13.8936	22.7396	8.84596	6.88142	1.96453	0.256222	0.24187	0.0157124	0.0126036
Si_APOE 2#	13.8762	22.7612	8.88498	6.88142	2.00356	0.249385
Si_APOE 2#	13.9283	22.9941	9.06583	6.88142	2.18441	0.220002
CYP1B1	Gapdh	SiRNA	ΔCт	ΔCт Mean 0h	ΔΔCт	2-△△CT	Mean	SD	P
Si_NC	13.5909	22.7879	9.19692	9.30616	-0.109246	1.07866	1.00173	0.0591068
Si_NC	13.5755	22.8939	9.31838	9.30616	0.0122175	0.991567
Si_NC	13.6268	23.03	9.40319	9.30616	0.0970285	0.934957
Si_CYP1B1 1#	13.9413	25.0505	11.1092	9.30616	1.80301	0.286576	0.251903	0.0248105	7.82077e-05
Si_CYP1B1 1#	13.8172	25.187	11.3698	9.30616	2.0636	0.239219
Si_CYP1B1 1#	13.6978	25.1248	11.427	9.30616	2.12084	0.229913
Si_CYP1B1 2#	13.0901	24.5111	11.421	9.30616	2.11483	0.230873	0.230121	0.00908304	5.30494e-05
Si_CYP1B1 2#	13.106	24.4659	11.36	9.30616	2.05379	0.240851
Si_CYP1B1 2#	13.1832	24.6827	11.4995	9.30616	2.19337	0.21864
SPP1	Gapdh	SiRNA	ΔCт	ΔCт Mean 0h	ΔΔCт	2-△△CT	Mean	SD	P
Si_NC	13.5909	23.6129	10.022	10.2502	-0.228224	1.17139	1.01165	0.149794
Si_NC	13.5755	23.7522	10.1767	10.2502	-0.0735016	1.05227
Si_NC	13.6268	24.1787	10.5519	10.2502	0.301725	0.811282
Si_SPP1 1#	13.9413	25.8549	11.9136	10.2502	1.66337	0.315701	0.280828	0.026406	0.00245001
Si_SPP1 1#	13.8172	25.9301	12.1129	10.2502	1.86271	0.27496
Si_SPP1 1#	13.6978	25.9375	12.2397	10.2502	1.98952	0.251823
Si_SPP1 2#	14.0901	26.2203	12.1302	10.2502	1.88005	0.271674	0.264228	0.005424	0.00213237
Si_SPP1 2#	14.106	26.2879	12.182	10.2502	1.9318	0.262102
Si_SPP1 2#	14.1832	26.3829	12.1997	10.2502	1.94948	0.258909
HCT116
CD274	Gapdh	SiRNA	ΔCт	ΔCт Mean 0h	ΔΔCт	2-△△CT	Mean	SD	P
Si_NC	13.6171	26.5334	12.9163	13.1087	-0.192395	1.14266	1.00777	0.123036
Si_NC	13.571	26.9224	13.3514	13.1087	0.242739	0.84514
Si_NC	13.7573	26.8156	13.0583	13.1087	-0.0503436	1.03551
Si_C5AR1 1#	13.8125	27.673	13.8605	13.1087	0.751855	0.593839	0.570161	0.0458329	0.00921511
Si_C5AR1 1#	13.6438	27.7351	14.0913	13.1087	0.982598	0.506068
Si_C5AR1 1#	13.7893	27.6098	13.8204	13.1087	0.711758	0.610576
Si_C5AR1 2#	13.7084	27.7637	14.0553	13.1087	0.946646	0.518837	0.549833	0.0536358	0.00849133
Si_C5AR1 2#	13.7794	27.8726	14.0932	13.1087	0.98457	0.505376
Si_C5AR1 2#	13.9299	27.716	13.7861	13.1087	0.67741	0.625287
CD274	Gapdh	SiRNA	ΔCт	ΔCт Mean 0h	ΔΔCт	2-△△CT	Mean	SD	P
Si_NC	13.9253	25.6793	11.754	11.6125	0.141483	0.906587	1.00405	0.091046
Si_NC	13.9654	25.6071	11.6418	11.6125	0.0292746	0.979913
Si_NC	13.8374	25.2791	11.4417	11.6125	-0.170758	1.12565
Si_APOE 1#	13.5811	26.2307	12.6496	11.6125	1.0371	0.487307	0.500765	0.0192421	0.00156998
Si_APOE 1#	13.6549	26.3053	12.6505	11.6125	1.03797	0.487011
Si_APOE 1#	13.6601	26.194	12.5339	11.6125	0.921454	0.527977
Si_APOE 2#	13.5207	26.2734	12.7527	11.6125	1.14025	0.453682	0.476332	0.0160334	0.00127904
Si_APOE 2#	13.5593	26.2105	12.6512	11.6125	1.03876	0.486747
Si_APOE 2#	13.5972	26.2431	12.6459	11.6125	1.03337	0.488567
CD274	Gapdh	SiRNA	ΔCт	ΔCт Mean 0h	ΔΔCт	2-△△CT	Mean	SD	P
Si_NC	13.9253	26.4397	12.5144	12.4301	0.0842477	0.943276	1.00403	0.0918058
Si_NC	13.9654	26.2144	12.249	12.4301	-0.18114	1.13378
Si_NC	13.8374	26.3644	12.527	12.4301	0.0968926	0.935045
Si_CYP1B1 1#	13.5811	26.5197	12.9386	12.4301	0.508439	0.702983	0.719309	0.0137105	0.0122731
Si_CYP1B1 1#	13.6549	26.5262	12.8713	12.4301	0.441183	0.736531
Si_CYP1B1 1#	13.6601	26.5673	12.9073	12.4301	0.477114	0.718413
Si_CYP1B1 2#	13.5207	26.6403	13.1196	12.4301	0.689459	0.620086	0.676588	0.0437167	0.010385
Si_CYP1B1 2#	13.5593	26.5392	12.98	12.4301	0.549822	0.683104
Si_CYP1B1 2#	13.5972	26.4882	12.891	12.4301	0.460819	0.726573
CD274	Gapdh	SiRNA	ΔCт	ΔCт Mean 0h	ΔΔCт	2-△△CT	Mean	SD	P
Si_NC	14.6171	26.2714	11.6543	11.6632	-0.00894863	1.00622	1.00005	0.0102934
Si_NC	14.571	26.2552	11.6842	11.6632	0.020999	0.98555
Si_NC	14.7573	26.4085	11.6512	11.6632	-0.0120504	1.00839
Si_SPP1 1#	14.8125	26.9248	12.1123	11.6632	0.449058	0.732521	0.674302	0.0570686	0.00135958
Si_SPP1 1#	14.6438	27.0518	12.4079	11.6632	0.744714	0.596786
Si_SPP1 1#	14.7893	26.9804	12.1911	11.6632	0.527828	0.693598
Si_SPP1 2#	14.7084	26.9502	12.2419	11.6632	0.578623	0.669603	0.658975	0.0164817	1.56335e-05
Si_SPP1 2#	14.7794	27.0962	12.3168	11.6632	0.653593	0.635695
Si_SPP1 2#	14.9299	27.1674	12.2375	11.6632	0.574271	0.671626
HT29
CD274	Gapdh	SiRNA	ΔCт	ΔCт Mean 0h	ΔΔCт	2-△△CT	Mean	SD	P
Si_NC	13.9253	25.5291	11.6037	11.6006	0.00314045	0.997826	1.00004	0.0093471
Si_NC	13.9654	25.5481	11.5828	11.6006	-0.0178337	1.01244
Si_NC	13.8374	25.4527	11.6153	11.6006	0.0146933	0.989867
Si_C5AR1 1#	13.5811	25.831	12.2498	11.6006	0.649228	0.637622	0.570228	0.0480679	0.000242137
Si_C5AR1 1#	13.6549	26.1332	12.4783	11.6006	0.877692	0.544237
Si_C5AR1 1#	13.6601	26.1798	12.5197	11.6006	0.919136	0.528826
Si_C5AR1 2#	13.5207	26.102	12.5813	11.6006	0.980715	0.506729	0.546708	0.0841967	0.00163418
Si_C5AR1 2#	13.5593	25.751	12.1917	11.6006	0.591112	0.663831
Si_C5AR1 2#	13.5972	26.2884	12.6912	11.6006	1.0906	0.469565
CD274	Gapdh	SiRNA	ΔCт	ΔCт Mean 0h	ΔΔCт	2-△△CT	Mean	SD	P
Si_NC	13.6171	25.4061	11.7889	11.8466	-0.0576635	1.04078	1.00077	0.0390803
Si_NC	13.571	25.495	11.924	11.8466	0.0774269	0.947746
Si_NC	13.7573	25.5842	11.8268	11.8466	-0.0197634	1.01379
Si_APOE 1#	13.8125	26.4105	12.598	11.8466	0.751448	0.594007	0.53148	0.0505815	0.000485816
Si_APOE 1#	13.6438	26.5793	12.9355	11.8466	1.08888	0.470125
Si_APOE 1#	13.7893	26.551	12.7617	11.8466	0.915095	0.530309
Si_APOE 2#	13.7084	26.6274	12.919	11.8466	1.07241	0.475523	0.518912	0.0374377	0.000228957
Si_APOE 2#	13.7794	26.5852	12.8058	11.8466	0.959233	0.51433
Si_APOE 2#	13.9299	26.5954	12.6655	11.8466	0.81888	0.566882
CD274	Gapdh	SiRNA	ΔCт	ΔCт Mean 0h	ΔΔCт	2-△△CT	Mean	SD	P
Si_NC	13.9253	25.9203	11.9949	12.0317	-0.0367823	1.02582	1.0014	0.0522992
Si_NC	13.9654	25.9272	11.9618	12.0317	-0.0698967	1.04964
Si_NC	13.8374	25.9758	12.1384	12.0317	0.106679	0.928723
Si_CYP1B1 1#	13.5207	26.3664	12.8457	12.0317	0.813964	0.568817	0.612727	0.0322488	0.000863599
Si_CYP1B1 1#	13.5593	26.2228	12.6636	12.0317	0.631838	0.645354
Si_CYP1B1 1#	13.5972	26.3093	12.7121	12.0317	0.680355	0.624012
Si_CYP1B1 2#	13.5811	26.5587	12.9776	12.0317	0.945884	0.519111	0.60936	0.0648362	0.00264658
Si_CYP1B1 2#	13.6549	26.3294	12.6746	12.0317	0.642846	0.640448
Si_CYP1B1 2#	13.6601	26.2728	12.6127	12.0317	0.580957	0.66852
CD274	Gapdh	SiRNA	ΔCт	ΔCт Mean 0h	ΔΔCт	2-△△CT	Mean	SD	P
Si_NC	13.6171	26.6876	13.0705	13.1552	-0.0847631	1.06051	1.00089	0.0425165
Si_NC	13.571	26.7586	13.1876	13.1552	0.0324173	0.977781
Si_NC	13.7573	26.9649	13.2076	13.1552	0.0523458	0.964367
Si_SPP1 1#	13.7084	27.4599	13.7515	13.1552	0.596243	0.661474	0.686084	0.051612	0.00264351
Si_SPP1 1#	13.7794	27.581	13.8016	13.1552	0.646386	0.638879
Si_SPP1 1#	13.9299	27.4851	13.5551	13.1552	0.399923	0.757899
Si_SPP1 2#	13.8125	27.5272	13.7147	13.1552	0.559485	0.678544	0.657044	0.0460415	0.0014868
Si_SPP1 2#	13.6438	27.5528	13.909	13.1552	0.753732	0.593068
Si_SPP1 2#	13.7893	27.4601	13.6708	13.1552	0.515562	0.69952
C5AR1	Gapdh	SiRNA	ΔCт	ΔCт Mean 0h	ΔΔCт	2-△△CT	Mean	SD	P
NCM460	14.7441	22.3646	7.62047	7.54521	0.0752662	0.949167	1.00342	0.0843219
NCM460	14.7021	22.3387	7.63667	7.54521	0.0914596	0.938573
NCM460	14.6627	22.0412	7.37848	7.54521	-0.166726	1.12251
HCT116	14.8063	21.461	6.65465	7.54521	-0.890563	1.8539	1.8017	0.0811598	0.000645982
HCT116	14.899	21.5457	6.64671	7.54521	-0.898502	1.86413
HCT116	14.7563	21.547	6.79068	7.54521	-0.754526	1.68708
HT29	14.315	21.2641	6.94908	7.54521	-0.596125	1.51165	1.54918	0.0342282	0.0010595
HT29	14.3284	21.2493	6.9209	7.54521	-0.624304	1.54147
HT29	14.3692	21.2414	6.87218	7.54521	-0.673033	1.59442
LOVO	14.4508	21.7318	7.28097	7.54521	-0.264237	1.201	1.26993	0.06159	0.0225647
LOVO	14.4674	21.6811	7.21374	7.54521	-0.331466	1.25829
LOVO	14.4885	21.6002	7.1117	7.54521	-0.433505	1.35051
APOE	Gapdh	SiRNA	ΔCт	ΔCт Mean 0h	ΔΔCт	2-△△CT	Mean	SD	P
NCM460	14.7441	23.7838	9.03968	9.00854	0.0311365	0.978649	1.00159	0.0569062
NCM460	14.7021	23.7903	9.08825	9.00854	0.0797071	0.94625
NCM460	14.6627	23.5604	8.8977	9.00854	-0.110844	1.07986
HCT116	14.8063	22.964	8.15765	9.00854	-0.850889	1.80361	1.82362	0.129039	0.00118121
HCT116	14.899	22.9143	8.01526	9.00854	-0.993283	1.99071
HCT116	14.7563	23.0194	8.26306	9.00854	-0.745482	1.67653
HT29	14.315	22.7433	8.42832	9.00854	-0.580223	1.49508	1.56467	0.0922007	0.00182515
HT29	14.3284	22.7482	8.41977	9.00854	-0.588775	1.50397
HT29	14.3692	22.6165	8.24729	9.00854	-0.761251	1.69496
LOVO	14.4508	23.1991	8.74829	9.00854	-0.260254	1.19769	1.26636	0.102403	0.0330171
LOVO	14.4674	23.2246	8.75724	9.00854	-0.251305	1.19028
LOVO	14.4885	23.0002	8.5117	9.00854	-0.496841	1.41112
CYP1B1	Gapdh	SiRNA	ΔCт	ΔCт Mean 0h	ΔΔCт	2-△△CT	Mean	SD	P
NCM460	14.7441	22.5625	7.81839	7.86454	-0.0461448	1.0325	1.00345	0.0819726
NCM460	14.7021	22.4474	7.74536	7.86454	-0.119175	1.08611
NCM460	14.6627	22.6926	8.02986	7.86454	0.16532	0.891731
HCT116	14.8063	20.9045	6.09817	7.86454	-1.76637	3.40197	3.47215	0.0530911	3.65499e-06
HCT116	14.899	20.9628	6.06374	7.86454	-1.8008	3.48413
HCT116	14.7563	20.8011	6.04473	7.86454	-1.81981	3.53035
HT29	14.315	20.8217	6.50672	7.86454	-1.35782	2.56298	2.47046	0.068082	4.10306e-05
HT29	14.3284	20.9293	6.60083	7.86454	-1.26371	2.40112
HT29	14.3692	20.9426	6.57336	7.86454	-1.29118	2.44728
LOVO	14.4508	21.9749	7.52404	7.86454	-0.340496	1.26619	1.29975	0.0398782	0.0100547
LOVO	14.4674	21.9788	7.51146	7.86454	-0.353083	1.27729
LOVO	14.4885	21.9139	7.42541	7.86454	-0.43913	1.35579
SPP1	Gapdh	SiRNA	ΔCт	ΔCт Mean 0h	ΔΔCт	2-△△CT	Mean	SD	P
NCM460	14.7441	23.6123	8.86826	8.928	-0.0597461	1.04228	1.00044	0.0298141
NCM460	14.7021	23.6533	8.95127	8.928	0.0232617	0.984006
NCM460	14.6627	23.6272	8.96449	8.928	0.0364844	0.975028
HCT116	14.8063	22.4581	7.65176	8.928	-1.27624	2.42208	2.39037	0.123872	0.000103003
HCT116	14.899	22.4915	7.59245	8.928	-1.33555	2.52373
HCT116	14.7563	22.5303	7.774	8.928	-1.15401	2.22531
HT29	14.315	22.387	8.07207	8.928	-0.855936	1.80993	1.91642	0.079255	0.0001065
HT29	14.3284	22.2565	7.92804	8.928	-0.999969	1.99996
HT29	14.3692	22.3417	7.97243	8.928	-0.955578	1.93936
LOVO	14.4508	23.1469	8.69608	8.928	-0.23192	1.1744	1.25896	0.0678843	0.00786711
LOVO	14.4674	23.0598	8.59244	8.928	-0.335565	1.26187
LOVO	14.4885	22.9936	8.50512	8.928	-0.422881	1.3406
